# Supplementary material for: De Novo Biosynthesis of Violacein Utilizing Saccharomyces cerevisiae as a Cell Factory
Source: Research Square preprint supplement (doi:10.21203/rs.3.rs-6768705/v1), 2025-06-27
Supplement: Supplementary file 1 [file 6a5b197a23958610b5ceb862.docx]

**Supporting information**

**Table S1** Experimental parameters and levels for bioethanol production.

| Parameter | Symbol | Coded factor level | | |
| --- | --- | --- | --- | --- |
| -1 | 0 | 1 |
| L-trp （g/L） | A | 0 | 0.4 | 0.8 |
| Inoculation amount (%) | B | 1 | 1.5 | 2 |
| Glucose (g/L) | C | 20 | 25 | 30 |

**Table S2** Design matrix for violacein.

| **Run** | **A** | **B** | **C** | **Yield of violacein** |
| --- | --- | --- | --- | --- |
| 1 | 1 | 0.4 | 2 | 30 |
| 2 | 2 | 0.4 | 1.5 | 25 |
| 3 | 3 | 0.4 | 1 | 20 |
| 4 | 4 | 0 | 1 | 25 |
| 5 | 5 | 0.4 | 2 | 20 |
| 6 | 6 | 0.8 | 2 | 25 |
| 7 | 7 | 0.4 | 1.5 | 25 |
| 8 | 8 | 0 | 2 | 25 |
| 9 | 9 | 0.8 | 1.5 | 30 |
| 10 | 10 | 0.8 | 1.5 | 20 |
| 11 | 11 | 0.8 | 1 | 25 |
| 12 | 12 | 0.4 | 1.5 | 25 |
| 13 | 13 | 0.4 | 1 | 30 |
| 14 | 14 | 0.4 | 1.5 | 25 |
| 15 | 15 | 0 | 1.5 | 30 |
| 16 | 16 | 0 | 1.5 | 20 |
| 17 | 17 | 0.4 | 1.5 | 25 |

**Table S3** Significance test and variance results for quadratic model

| **Source** | **Sum of Squares** | **df** | **Mean Square** | **F-value** | **p-value** |  |
| --- | --- | --- | --- | --- | --- | --- |
| Model | 1572.24 | 9 | 174.69 | 10.52 | 0.0026 | ** |
| A | 49.66 | 1 | 49.66 | 2.99 | 0.1273 |  |
| B | 211.24 | 1 | 211.24 | 12.73 | 0.0091 | ** |
| C | 195.37 | 1 | 195.37 | 11.77 | 0.011 | ** |
| AB | 0.845 | 1 | 0.845 | 0.0509 | 0.8279 |  |
| AC | 90.08 | 1 | 90.08 | 5.43 | 0.0426 | ** |
| BC | 33.97 | 1 | 33.97 | 2.05 | 0.1957 |  |
| A2 | 291.79 | 1 | 291.79 | 17.58 | 0.0041 | ** |
| B2 | 60.96 | 1 | 60.96 | 3.67 | 0.0968 |  |
| C2 | 552.69 | 1 | 552.69 | 33.3 | 0.0007 | ** |
| Residual | 116.2 | 7 | 16.6 |  |  |  |
| Lack of Fit | 116.2 | 3 | 38.73 |  |  |  |
| Pure Error | 0 | 4 | 0 |  |  |  |
| Cor Total | 1688.44 | 16 |  |  |  |  |

Note: A is the L-trp concentration, B is the Inoculation amount, C is the Glucose concentration, and df is the degree of


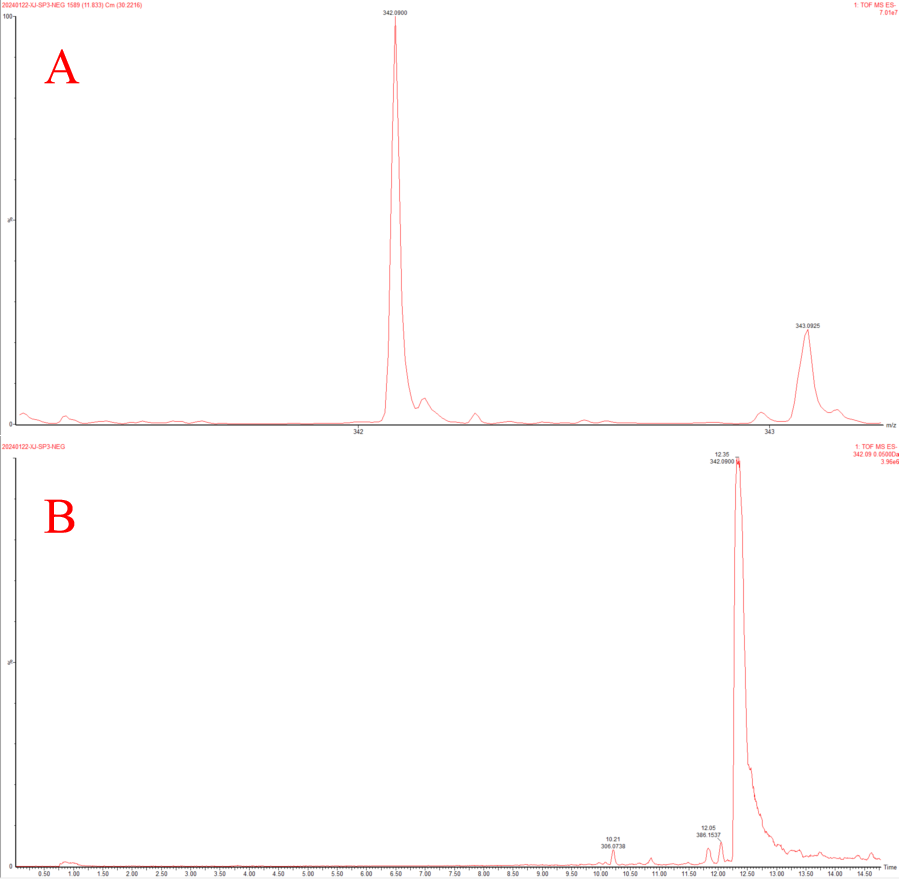


Figure S1 Liquid Chromatography-Mass Spectrometry result of violacein in ES-. A: Violacein in HPLC. B: Violacein in MS


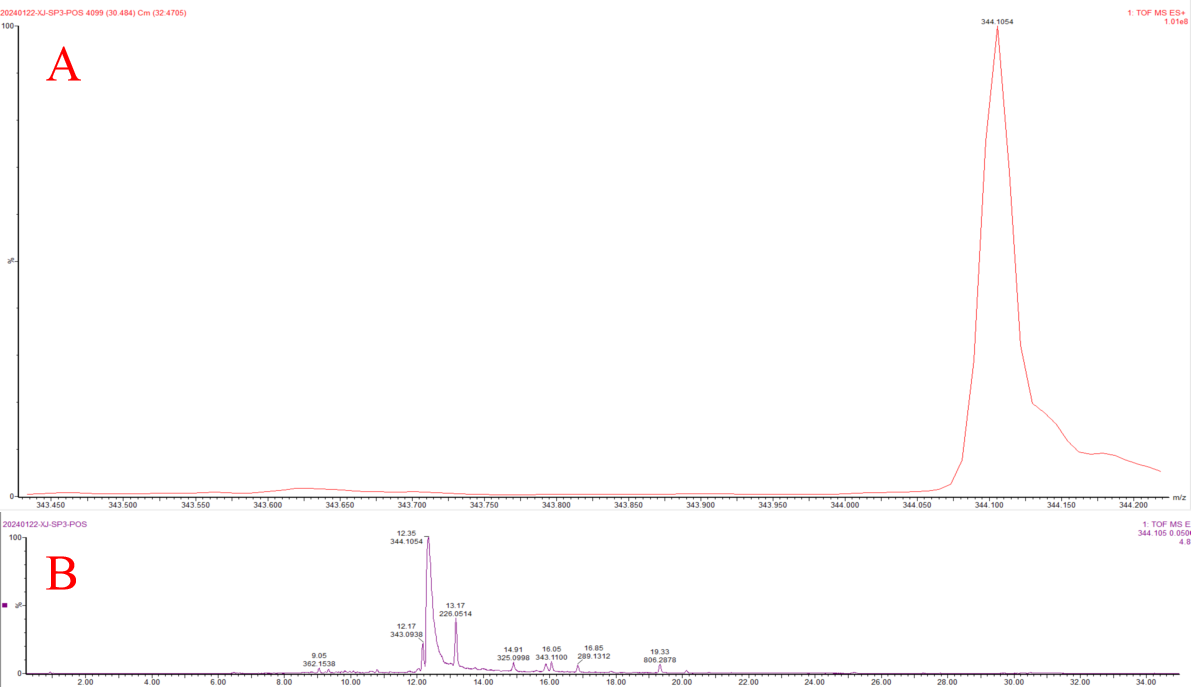


Figure S2 Liquid Chromatography-Mass Spectrometry result of violacein in ES+. A: Violacein in HPLC. B: Violacein in MS.
